# Supplementary material for: In Vitro and In Silico Anti-Arboviral Activities of Dihalogenated Phenolic Derivates of L-Tyrosine
Source: MDPI journal article supplement (doi:10.3390/molecules26113430), 2021-06-05
Supplement: s1 [file s1]

**Table S2:** PFU/ml obtained with the treatment with di-halogenated compounds derived from L-Tyrosine in combined strategy.

|                  | DENV-2/S16803          | ZIKV/Col               | CHIKV/Col              |
|------------------|------------------------|------------------------|------------------------|
| <i>Control</i>   | 1.25x10 <sup>06</sup>  | 1.71x10 <sup>06</sup>  | 3.35x10 <sup>17</sup>  |
| <i>Suramine</i>  | <1.00x10 <sup>00</sup> | <1.00x10 <sup>00</sup> | <1.00x10 <sup>00</sup> |
| <i>Ribavirin</i> | 6.25x10 <sup>04</sup>  | 9.80x10 <sup>04</sup>  | 2.63x10 <sup>16</sup>  |
| <i>TDC</i>       | 7.69x10 <sup>06</sup>  | 4.63x10 <sup>06</sup>  | 1.49x10 <sup>17</sup>  |
| <i>TDB</i>       | 6.00x10 <sup>06</sup>  | 4.44x10 <sup>06</sup>  | 1.13x10 <sup>17</sup>  |
| <i>TDC_2M_ME</i> | 3.25x10 <sup>06</sup>  | 5.85x10 <sup>05</sup>  | 7.63x10 <sup>16</sup>  |
| <i>TDB_2M_ME</i> | 2.94x10 <sup>06</sup>  | 9.27x10 <sup>05</sup>  | 5.06x10 <sup>16</sup>  |
| <i>TDC_2M</i>    | 3.50x10 <sup>06</sup>  | 4.50x10 <sup>06</sup>  | 9.56x10 <sup>16</sup>  |
| <i>TDB_2M</i>    | 1.83x10 <sup>06</sup>  | 4.69x10 <sup>06</sup>  | 1.16x10 <sup>17</sup>  |
| <i>TDC_3M_ME</i> | 3.56x10 <sup>06</sup>  | 4.06x10 <sup>06</sup>  | 1.26x10 <sup>17</sup>  |
| <i>TDB_3M_ME</i> | 6.31x10 <sup>06</sup>  | 7.44x10 <sup>06</sup>  | 1.70x10 <sup>17</sup>  |
| <i>TDC_3M</i>    | 5.19x10 <sup>06</sup>  | 8.13x10 <sup>06</sup>  | 1.46x10 <sup>17</sup>  |
| <i>TDB_3M</i>    | 3.69x10 <sup>06</sup>  | 3.94x10 <sup>06</sup>  | 1.34x10 <sup>17</sup>  |
