# Supplementary material for: In Vitro and In Silico Anti-Arboviral Activities of Dihalogenated Phenolic Derivates of L-Tyrosine
Source: MDPI journal article supplement (doi:10.3390/molecules26113430), 2021-06-05
Supplement: s1 [file s1]

**Table S4: *In silico* molecular interactions between TDC-2M-ME and TDB-2M-ME with viral and cellular proteins by LigPlot®.**

| Virus. Protein and PDB code                                 | Ligand    | Free binding energy (Kcal/mol) | Hydrogen bonds | Residues and distance of H+ bonds (Å)    | Hydrophobic interactions | Residues participating in hydrophobic interactions                          |
|-------------------------------------------------------------|-----------|--------------------------------|----------------|------------------------------------------|--------------------------|-----------------------------------------------------------------------------|
| <b>ZIKV Envelope – Domain III (5JHM)</b>                    | TDC_2M_ME | -4.80 ± 0.10                   | 2              | Ser146 (3.1); Lys373 (2.9)               | 20                       | Val143; Ser146; Gly145; Asn362; Pro363; Val364; Ile365; Thr366; Met374      |
|                                                             | TDB_2M_ME | -4.70 ± 0.10                   | 2              | Val364 (2.8); Thr366 (3.0)               | 7                        | Ile1; Gly145; Ser146; Ile365; Lys373; Met374; Met375                        |
| <b>ZIKV Envelope – Fusion Peptide (5JHM)</b>                | TDC_2M_ME | -5.00 ± 0.00                   | 2              | Cys3 (3.0); Gly5 (3.0)                   | 7                        | Ile1; Arg2; Val6; Asp98; Arg99; Gly102; Asn103                              |
|                                                             | TDB_2M_ME | -4.87 ± 0.06                   | 3              | Cys3 (3.0; 3.5); Asp98 (3.1)             | 8                        | Ile1; Arg2; Ile4; Gly5; Val6; Arg99; Gly102; Asn103                         |
| <b>ZIKV Core (5YGH)</b>                                     | TDC_2M_ME | -4.80 ± 0.00                   | 2              | Arg45 (3.3); Phe53 (3.3)                 | 16                       | Arg45. Met46. Ala49. Ala52. Phe53. Phe56. Phe84. Asp87                      |
|                                                             | TDB_2M_ME | -4.67 ± 0.06                   | N/A            | N/A                                      | 14                       | Arg45. Met46. Ala49. Ala52. Phe53. Phe56. Phe84. Asp87                      |
| <b>ZIKV NS1 – Glycoprotein (5K6K)</b>                       | TDC_2M_ME | -3.90 ± 0.00                   | 3              | Ser300 (3.3); Ala325 (2.8); Ly326 (3.2)  | 13                       | Pro281; Thr301; Arg324; Ala325; Lys326; Gly328; Cys329                      |
|                                                             | TDB_2M_ME | -3.77 ± 0.06                   | 3              | Ser300 (3.3); Ala325 (2.9); Ly326 (3.18) | 11                       | Pro281; Thr301; Arg324; Lys326; Gly328; Cys329                              |
| <b>ZIKV NS3 – Helicase Domain (5MFX)</b>                    | TDC_2M_ME | -6.10 ± 0.00                   | 3              | Thr290 (2.7); Asp291 (3.2); His486 (3.2) | 16                       | Phe289; Thr290; Asp291; Asp410; Ile411; Glu413; Met414; Leu430; His486      |
|                                                             | TDB_2M_ME | -5.97 ± 0.06                   | 3              | Thr290 (2.7); Asp291 (3.2); His486 (3.3) | 17                       | Phe289; Thr290; Asp291; Asp410; Ile411; Glu413; Met414; Leu430; His486      |
| <b>ZIKV NS3/NS2B – Cofactor peptide binding site (5GJ4)</b> | TDC_2M_ME | -4.77 ± 0.06                   | 2              | Asn70 (3.1); Asp129 (2.8)                | 17                       | Thr68; Gly69; Asn70; Ile109; Ala127; Leu128; Asp129; Tyr130; Ser160; Tyr161 |
|                                                             | TDB_2M_ME | -4.50 ± 0.00                   | 1              | Asn70 (3.0)                              | 17                       | Thr68; Gly69; Asn70; Ala127; Leu128; Asp129; Tyr130; Ser160; Tyr161         |
| <b>ZIKV NS3– Protease Catalytic site (5GJ4)</b>             | TDC_2M_ME | -4.53 ± 0.06                   | 1              | Lys169 (3.0)                             | 16                       | Leu78; Gln74; Asp122; Ile123; Ile165; Thr166; Gln167; Gly168                |
|                                                             | TDB_2M_ME | -4.57 ± 0.12                   | 3              | Gln74 (3.0; 3.1); Lys169 (3.0)           | 8                        | Gln74; Ile123; Thr166; Gln167                                               |

|                                              |                  |              |   |                                             |    |                                                                   |
|----------------------------------------------|------------------|--------------|---|---------------------------------------------|----|-------------------------------------------------------------------|
| <b>ZIKV NS5 –<br/>RDRP Domain<br/>(5U04)</b> | <i>TDC_2M_ME</i> | -5.57 ± 0.12 | 3 | Arg623 (3.1); Asp665 (3.0);<br>Cys667 (3.3) | 15 | Asn616; Val619; Gln620; Arg623;<br>Asp665; Leu683; Lys688         |
|                                              | <i>TDB_2M_ME</i> | -5.40 ± 0.17 | 2 | Arg623 (3.0); Cys667 (3.3)                  | 15 | Asn616; Val619; Gln620; Arg623;<br>Asp665; Leu683; Lys688; Val689 |

| <b>Virus. Protein<br/>and PDB code</b>             | <b>Ligand</b>    | <b>Free binding<br/>energy<br/>(Kcal/mol)</b> | <b>Hydrogen<br/>bonds</b> | <b>Residues and distance of<br/>H+ bonds (Å)</b> | <b>Hydrophobic<br/>interactions</b> | <b>Residues participating in<br/>hydrophobic interactions</b>                            |
|----------------------------------------------------|------------------|-----------------------------------------------|---------------------------|--------------------------------------------------|-------------------------------------|------------------------------------------------------------------------------------------|
| <b>CHIKV<br/>Envelope – E2<br/>(3N44)</b>          | <i>TDC_2M_ME</i> | -5.17 ± 0.12                                  | 1                         | Asn72 (2.8)                                      | 10                                  | Arg13; Tyr15; Leu16; His29; Met70;<br>Pro173; Thr175; Leu241; Val242;<br>Pro243          |
|                                                    | <i>TDB_2M_ME</i> | -5.17 ± 0.12                                  | N/A                       | N/A                                              | 11                                  | Arg13; Tyr15; Leu16; Met70; Asn72;<br>His73; Pro173; Thr175; Pro176;<br>Gln236; Val242   |
| <b>CHIKV Core –<br/>Protease<br/>Domain (5H23)</b> | <i>TDC_2M_ME</i> | -4.80 ± 0.00                                  | 3                         | Ile144 (3.3); Phe154 (2.8);<br>Arg156 (2.8)      | 17                                  | Lys136; Thr143; Ile144; Ala150;<br>Ala153; Phe154; Glu163                                |
|                                                    | <i>TDB_2M_ME</i> | -4.70 ± 0.00                                  | N/A                       | N/A                                              | 15                                  | Lys136; Val140; Gly142; Thr143;<br>Ile144; Ala150; Leu152; Phe154;<br>Arg156; Glu163     |
| <b>CHIKV NSP2 –<br/>Protease<br/>Domain (3TRK)</b> | <i>TDC_2M_ME</i> | -5.53 ± 0.06                                  | 3                         | Tyr1047 (3.0); Tyr1079<br>(2.9); Trp1084 (3.2)   | 9                                   | Ala1046; Tyr1079; Asn1082; Trp1084;<br>Leu1205; Asp1246                                  |
|                                                    | <i>TDB_2M_ME</i> | -5.43 ± 0.06                                  | 3                         | Tyr1047 (3.0); Tyr1079<br>(2.9); Trp1084 (3.1)   | 10                                  | Ala1046; Ser1048; Tyr1079; Asn1082;<br>Trp1084; Leu1205; Asp1246                         |
| <b>CHIKV NSP2 –<br/>Helicase<br/>Domain (6JIM)</b> | <i>TDC_2M_ME</i> | -5.80 ± 0.00                                  | 2                         | Arg172 (3.2); Thr261 (3.0)                       | 13                                  | Ser88; Met91; Val92; Glu95; Tyr161;<br>His162; Ala165; Asp235; Thr261;<br>Phe286         |
|                                                    | <i>TDB_2M_ME</i> | -5.73 ± 0.06                                  | 3                         | Ser88 (3.3); Arg172 (3.2);<br>Thr261 (2.7)       | 14                                  | Met91; Val92; Glu95; Tyr161; His162;<br>Ala165; Asp235; Leu238; Thr261;<br>Phe286        |
| <b>CHIKV NSP3 –<br/>Macrodomain<br/>(3GPG)</b>     | <i>TDC_2M_ME</i> | -5.67 ± 0.06                                  | N/A                       | N/A                                              | 20                                  | Ala22; Asp31; Gly32; Val33; Leu108;<br>Thr111; Gly112; Val113; Tyr142;<br>Cys143; Trp148 |
|                                                    | <i>TDB_2M_ME</i> | -5.77 ± 0.06                                  | 1                         | Cys34 (3.2)                                      | 22                                  | Ala22; Asp31; Val33; Cys34; Leu108;<br>Ser110; Thr111; Gly112; Val113;<br>Tyr114         |

| Virus. Protein and PDB code                              | Ligand    | Free binding energy (Kcal/mol) | Hydrogen bonds | Residues and distance of H+ bonds (Å)                  | Hydrophobic interactions | Residues participating in hydrophobic interactions                                                             |
|----------------------------------------------------------|-----------|--------------------------------|----------------|--------------------------------------------------------|--------------------------|----------------------------------------------------------------------------------------------------------------|
| <i>Cellular Protein DDC – L-Dopa binding site (1JS3)</i> | TDC_2M_ME | -7.10 ± 0.00                   | 2              | Ser149 (2.9); Lys303 (3.1)                             | 18                       | Tyr79; Ile101; Phe103; Ser147; His192; His302; Phe309; Leu353; Gly354                                          |
|                                                          | TDB_2M_ME | -7.07 ± 0.15                   | 4              | Ser149 (3.0; 3.1); Asn300 (3.2); Lys303 (3.0)          | 19                       | Tyr79; Phe103; Ser147; Ala148; Ser149; His192; His302; Phe309; Leu353; Gly354                                  |
| <i>Cellular Protein – α2a adrenoceptor (6KUX)</i>        | TDC_2M_ME | -6.40 ± 0.00                   | 3              | Ser90 (3.2) ; Tyr109 (2.7); Tyr146 (2.9)               | 15                       | Tyr109; Asp113; Val114; Ile190; Trp387; Phe390; Phe412; Tyr416                                                 |
|                                                          | TDB_2M_ME | -6.00 ± 0.00                   | 1              | Ile190 (3.0)                                           | 17                       | Asp113; Val114; Glu189; Ile190; Trp387; Phe390; Tyr394; Phe412; Tyr416                                         |
| <i>Cellular Protein – α2b adrenoceptor (6K41)</i>        | TDC_2M_ME | -6.17 ± 0.32                   | 2              | Thr97 (3.1); Ser180 (2.7)                              | 25                       | Asp92; Val93; Cys96; Thr97; Ile100; Leu166; Ser180; Trp384; Phe387; Phe388; Phe412; Tyr416                     |
|                                                          | TDB_2M_ME | -5.13 ± 0.15                   | 3              | Ser69 (2.7); Tyr88 (3.0); His405 (2.9)                 | 25                       | Ser69; Asn72; Glu73; Tyr88; Leu89; Cys164; Lys165; Leu166; His405; Phe408; Gln409; Phe412                      |
| <i>Cellular Protein – β1 adrenoceptor (7BVQ)</i>         | TDC_2M_ME | -6.77 ± 0.12                   | 2              | Asp1138 (3.0); Tyr1224 (3.0)                           | 25                       | Asp1138; Val1139; Val1142; Phe1218; Thr1220; Tyr1224; Ala1225; Ser1228; Ser1229; Ser1232                       |
|                                                          | TDB_2M_ME | -6.60 ± 0.00                   | 2              | Ser1228 (3.0); Ser1229 (3.2)                           | 22                       | Thr1135; Asp1138; Val1139; Val1142; Phe1218; Ala1225; Ser1228; Ser1229; Ser1232; Phe1340; Phe1341; Asn1344     |
| <i>Cellular Protein – β2 adrenoceptor (3D4S)</i>         | TDC_2M_ME | -7.37 ± 0.06                   | 4              | Asp113 (2.8); Tyr199 (2.8); Ser203 (2.9); Asn312 (3.0) | 20                       | Asp113; Val114; Val117; Phe193; Tyr199; Ala200; Ser203; Ser204; Trp286; Phe289                                 |
|                                                          | TDB_2M_ME | -7.20 ± 0.00                   | 4              | Asp113 (2.9); Tyr199 (2.9); Ser203 (2.9); Asn312 (3.0) | 19                       | Asp113; Val114; Val117; Phe193; Tyr199; Ala200; Ser203; Ser204; Trp286; Phe289; Phe290; Asn293; Tyr308; Asn312 |
