# Supplementary material for: In Vitro and In Silico Anti-Arboviral Activities of Dihalogenated Phenolic Derivates of L-Tyrosine
Source: MDPI journal article supplement (doi:10.3390/molecules26113430), 2021-06-05
Supplement: s1 [file s1]

**Table S1.** *In vitro* Viability of dihalogenated compounds derived from L-Tyrosine in U937 cells.

|                    | Concentration<br>( $\mu$ M) | Viability<br>Percentage | EEM  |
|--------------------|-----------------------------|-------------------------|------|
| <i>Ribavirin</i>   | 100                         | 87.9                    | 4.25 |
| <i>Doxycycline</i> | 50                          | 91.3                    | 4.03 |
| <i>TDC</i>         | 250                         | 89.6                    | 1.20 |
| <i>TDB</i>         | 250                         | 86.3                    | 1.13 |
| <i>TDC_2M_ME</i>   | 250                         | 89.5                    | 2.85 |
| <i>TDB_2M_ME</i>   | 250                         | 78.7                    | 3.62 |
| <i>TDC_2M</i>      | 250                         | 94.0                    | 3.96 |
| <i>TDB_2M</i>      | 250                         | 87.4                    | 4.12 |
| <i>TDC_3M_ME</i>   | 250                         | 87.6                    | 4.05 |
| <i>TDB_3M_ME</i>   | 250                         | 86.3                    | 3.80 |
| <i>TDC_3M</i>      | 250                         | 91.2                    | 2.86 |
| <i>TDB_3M</i>      | 250                         | 82.2                    | 2.68 |
