# Supplementary material for: In Vitro and In Silico Anti-Arboviral Activities of Dihalogenated Phenolic Derivates of L-Tyrosine
Source: MDPI journal article supplement (doi:10.3390/molecules26113430), 2021-06-05
Supplement: s1 [file s1]

**Table S3:** Estimated selectivity index of di-halogenated compounds derived from L-tyrosine.

|                  | ZIKV/Col | CHIKV/Col |
|------------------|----------|-----------|
| <i>TDC</i>       | --       | 7.3       |
| <i>TDB</i>       | --       | >1346.0   |
| <i>TDC_2M_ME</i> | 11.2     | 13.1      |
| <i>TDB_2M_ME</i> | 11.4     | 21.1      |
| <i>TDC_2M</i>    | --       | 136.2     |
| <i>TDB_2M</i>    | --       | 15.6      |
| <i>TDC_3M_ME</i> | --       | 102.2     |
| <i>TDB_3M_ME</i> | --       | 23.6      |
| <i>TDC_3M</i>    | --       | 7.1       |
| <i>TDB_3M</i>    | --       | 36.8      |
